# Supplementary material for: Asthma and incident coronary heart disease: an observational and Mendelian randomisation study
Source: PubMed Central journal article supplement (PMC10695770; doi:10.1183/13993003.01788-2023), 2023-11-30

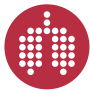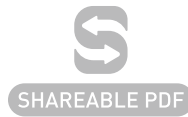

# Asthma and incident coronary heart disease: an observational and Mendelian randomisation study

Carlos A. Valencia-Hernández <sup>1</sup>, Fabiola Del Greco M<sup>2</sup>, Varun Sundaram<sup>3</sup>, Laura Portas<sup>1,4</sup>,  
Cosetta Minelli <sup>1</sup> and Chloe I. Bloom <sup>1</sup>

<sup>1</sup>National Heart and Lung Institute, Imperial College London, London, UK. <sup>2</sup>Institute for Biomedicine, Eurac Research, Bolzano, Italy. <sup>3</sup>Louis Stokes Cleveland Medical Center, Case Western Reserve University, Cleveland, OH, USA. <sup>4</sup>Oxford Big Data Institute, University of Oxford, Oxford, UK.

Corresponding author: Chloe I. Bloom ([chloe.bloom06@imperial.ac.uk](mailto:chloe.bloom06@imperial.ac.uk))

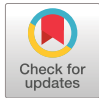

Shareable abstract (@ERSpublications)

**Our study using a triangulation approach, real-world data and genetic epidemiology found no association between asthma and coronary heart disease, in contrast to earlier studies** <https://bit.ly/3FuZHaP>

**Cite this article as:** Valencia-Hernández CA, Del Greco M F, Sundaram V, *et al.* Asthma and incident coronary heart disease: an observational and Mendelian randomisation study. *Eur Respir J* 2023; 62: 2301788 [DOI: 10.1183/13993003.01788-2023].

This extracted version can be shared freely online.

Copyright ©The authors 2023.

This version is distributed under the terms of the Creative Commons Attribution Licence 4.0.

This article has an editorial commentary:  
<https://doi.org/10.1183/13993003.02009-2023>

Received: 1 Sept 2023  
Accepted: 23 Oct 2023

## Abstract

**Background** Observational studies suggest asthma is a risk factor for coronary heart disease (CHD) and sex modifies the risk, but they may suffer from methodological limitations. To overcome these, we applied a “triangulation approach”, where different methodologies, with different potential biases, were leveraged to enhance confidence in findings.

**Methods** First, we conducted an observational study using UK medical records to match asthma patients 1:1, by age, sex and general practitioner (GP) practice, to the general population. We measured the association between asthma and incident CHD (myocardial infarction: hospitalisation/death) by applying minimal sufficient adjustment: model 1, smoking, body mass index, oral corticosteroids, atopy and deprivation; model 2, additionally adjusting for healthcare behaviour (GP consultation frequency). Second, we conducted a Mendelian randomisation (MR) study using data from the UK Biobank, Trans-National Asthma Genetic Consortium (TAGC) and Coronary Artery Disease Genome-wide Replication and Meta-analysis consortium (CARDIoGRAM). Using 64 asthma single nucleotide polymorphisms, the effect of asthma on CHD was estimated with inverse variance-weighted meta-analysis and methods that adjust for pleiotropy.

**Results** In our observational study (n=1 522 910), we found asthma was associated with 6% increased risk of CHD (model 1: HR 1.06, 95% CI 1.01–1.13); after accounting for healthcare behaviour, we found no association (model 2: HR 0.99, 95% CI 0.94–1.05). Asthma severity did not modify the association, but sex did (females: HR 1.11, 95% CI 1.01–1.21; males: HR 0.91, 95% CI 0.84–0.98). Our MR study (n=589 875) found no association between asthma and CHD (OR 1.01, 95% CI 0.98–1.04) and no modification by sex.

**Conclusions** Our findings suggest that asthma is not a risk factor for CHD. Previous studies may have suffered from detection bias or residual confounding.

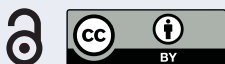

Supplement: ERJ-01788-2023.Shareable.pdf [file ERJ-01788-2023.Shareable.pdf]
